# Supplementary material for: Promising Biomolecules with High Antioxidant Capacity Derived from Cryptophyte Algae Grown under Different Light Conditions
Source: MDPI journal article supplement (doi:10.3390/biology11081112), 2022-07-26
Supplement: s1 [file s1]

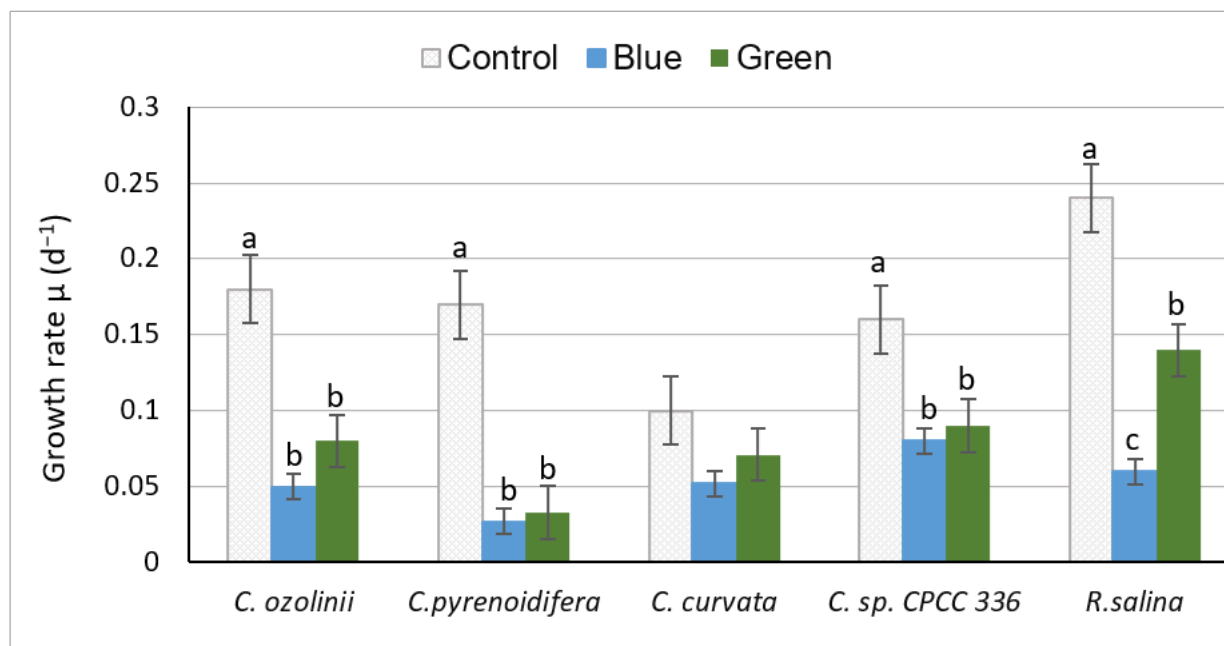

**Figure S1:** The growth rates ( $\mu$ : divisions  $\text{day}^{-1}$ ) of five studied cryptophyte strains cultivated under different light LEDs (white, blue and green). Significant differences between samples are indicated with different letters as determined by ANOVA comparison ( $p < 0.05$ ).
